# Supplementary material for: Aluminum Poisoning with Emphasis on Its Mechanism and Treatment of Intoxication
Source: Hindawi journal article supplement (doi:10.1155/2022/1480553), 2022-01-11

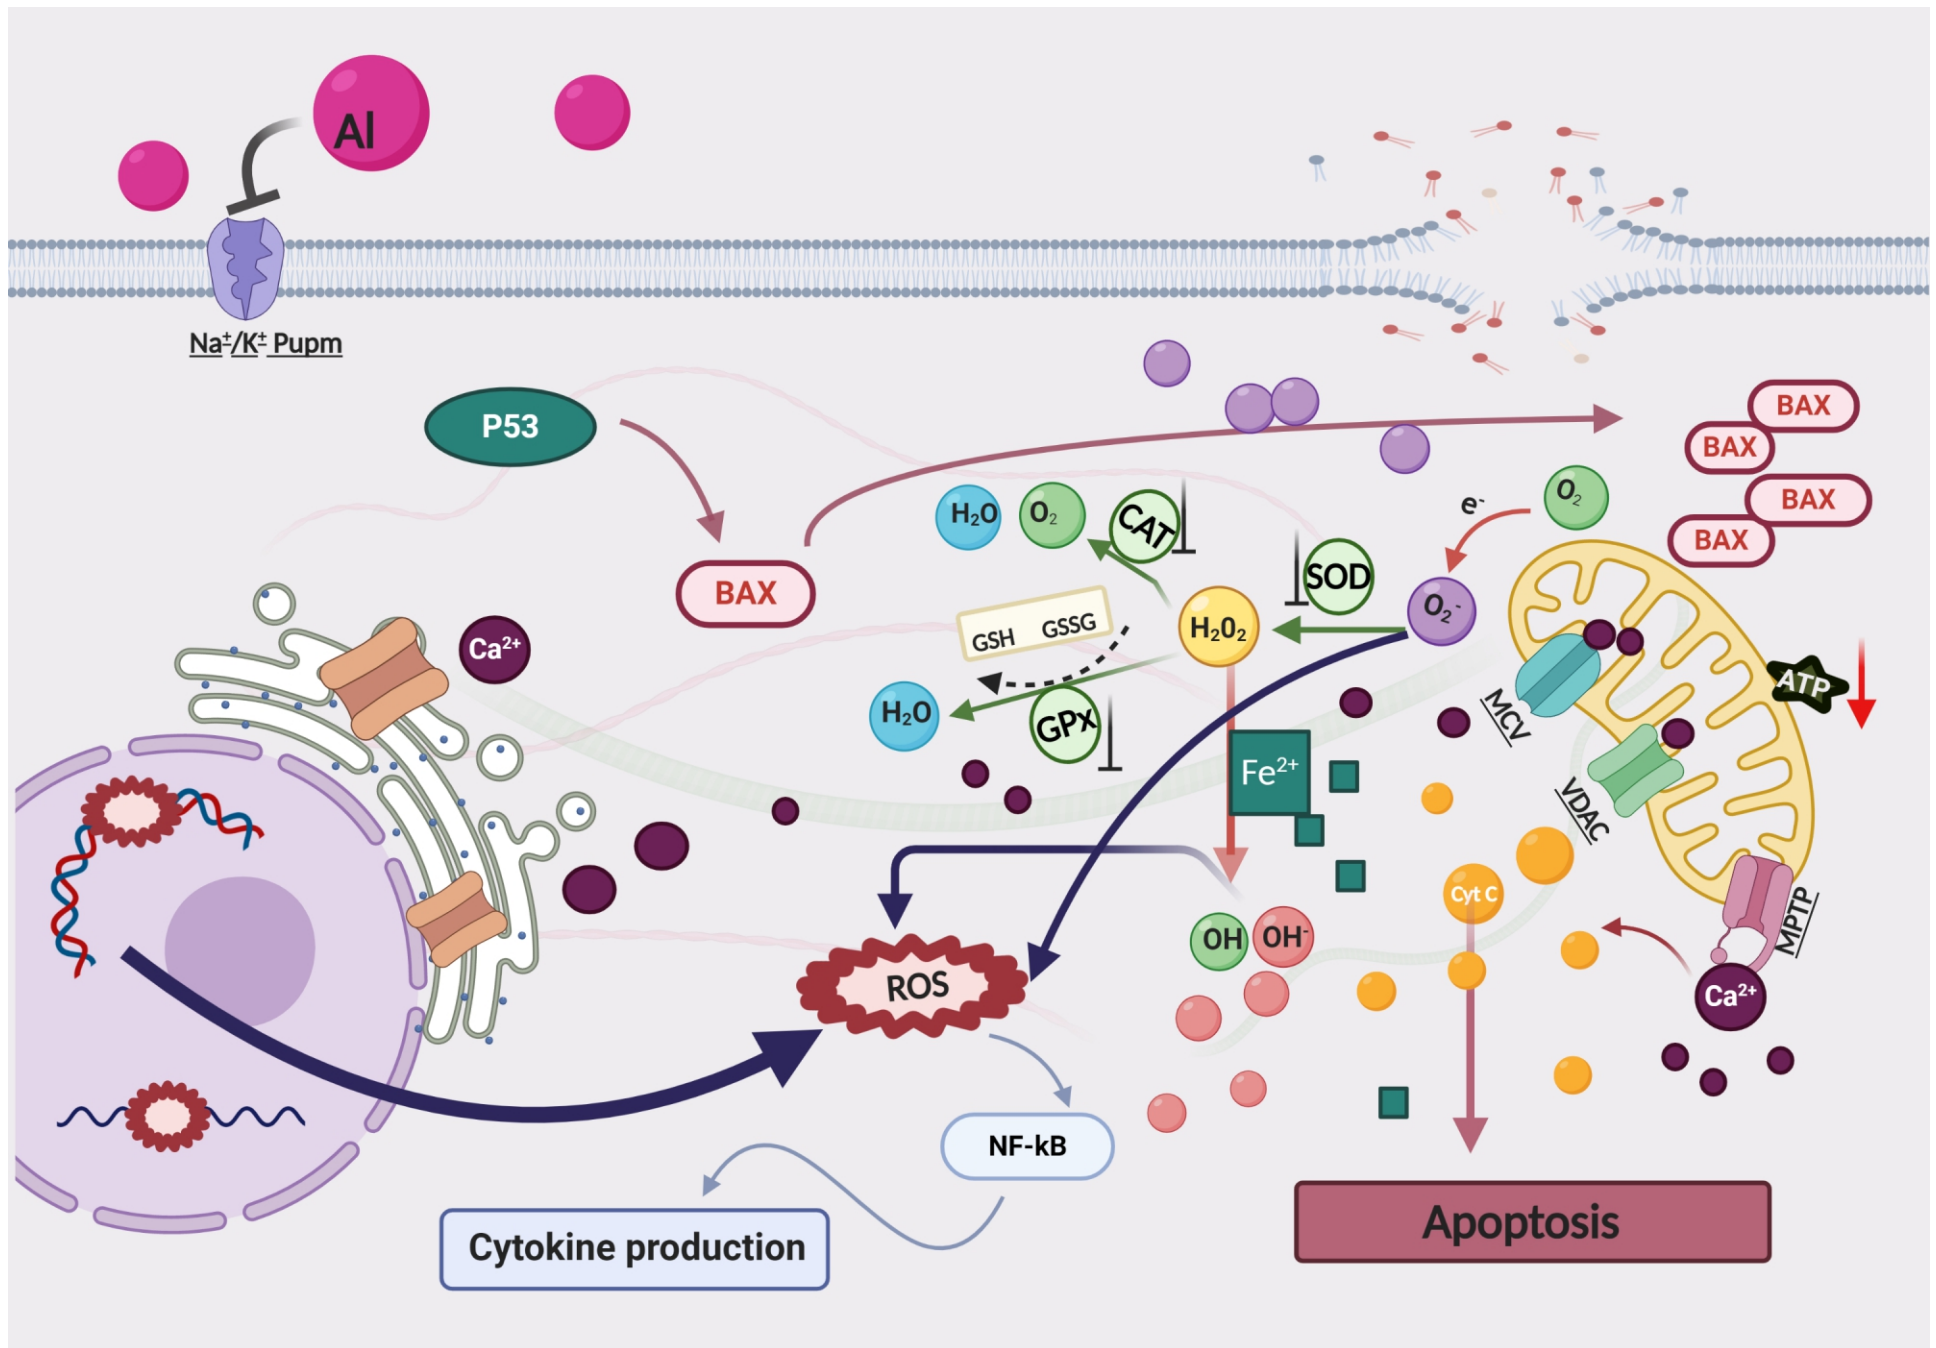

Supplement: f1 [file 1480553.f1.pdf]
